RESEARCH ARTICLE

# Wildfire-related PM<sub>2.5</sub> and respiratory transmitted disease among Chinese children and adolescents from 2008 to 2019: A retrospective study

Li Chen<sup>1,2†</sup>, Rongbin Xu<sup>3,4†</sup>, Junqing Xie<sup>5</sup>, Yi Xing<sup>1</sup>, Bo Wen<sup>6</sup>, Yao Wu<sup>4</sup>, Binbin Su<sup>6</sup>, Mengjie Geng<sup>7</sup>, Xiang Ren<sup>7</sup>, Yi Zhang<sup>1</sup>, Jieyu Liu<sup>1</sup>, Xinli Song<sup>1</sup>, Yang Qin<sup>1</sup>, RuoLin Wang<sup>1</sup>, Jianuo Jiang<sup>1</sup>, Tongjun Guo<sup>1</sup>, Wen Yuan<sup>1</sup>, Yinghua Ma<sup>1,2</sup>, Yanhui Dong<sup>1,2\*</sup>, Yi Song<sup>1,2\*</sup>, Jun Ma<sup>1,2</sup>, Shanshan Li<sup>4†</sup>, Yuming Guo<sup>4†</sup>

**1** Institute of Child and Adolescent Health, School of Public Health, Peking University; National Health Commission Key Laboratory of Reproductive Health, Beijing, China, **2** UNESCO Chair on Global Health and Education of Peking University, Beijing, China, **3** Chongqing Emergency Medical Center, Chongqing University Central Hospital, School of Medicine, Chongqing University, Chongqing, China, **4** Climate, Air Quality Research Unit, School of Public Health and Preventive Medicine, Monash University, Melbourne, Australia, **5** Centre for Statistics in Medicine, NDORMS, University of Oxford, Oxford, United Kingdom, **6** School of Population Medicine and Public Health, Chinese Academy of Medical Sciences/Peking Union Medical College, Beijing, China, **7** Division of Infectious Disease Control and Prevention, Key Laboratory of Surveillance and Early Warning on Infectious Disease, Chinese Center for Disease Control and Prevention, Beijing, China

† LC and RX are joint first co-authors on this work. SL and YG are joint senior authors on this work.

\* [dongyanhui@bjmu.edu.cn](mailto:dongyanhui@bjmu.edu.cn) (YD), [songyi@bjmu.edu.cn](mailto:songyi@bjmu.edu.cn) (YS)

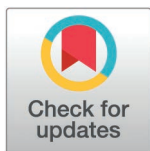

## OPEN ACCESS

**Citation:** Chen L, Xu R, Xie J, Xing Y, Wen B, Wu Y, et al. (2025) Wildfire-related PM<sub>2.5</sub> and respiratory transmitted disease among Chinese children and adolescents from 2008 to 2019: A retrospective study. PLoS Med 22(12): e1004613. <https://doi.org/10.1371/journal.pmed.1004613>

**Academic Editor:** Zulfiqar A. Bhutta, The Hospital for Sick Children, CANADA

**Received:** February 17, 2025

**Accepted:** October 24, 2025

**Published:** December 5, 2025

**Copyright:** © 2025 Chen et al. This is an open access article distributed under the terms of the [Creative Commons Attribution License](https://creativecommons.org/licenses/by/4.0/), which permits unrestricted use, distribution, and reproduction in any medium, provided the original author and source are credited.

**Data availability statement:** The data from the notifiable infectious disease report database are also openly accessible through the Public Health Science Data Centre of the Chinese Center for Disease Control and Prevention and the official website of the National Health and

## Abstract

### Background

Exposure to fine particles (PM<sub>2.5</sub>) from wildfires is known to cause deaths and chronic diseases, but its effect on respiratory infections, especially in children and adolescents, is not well characterized. We aimed to comprehensively assess the association between short-term exposure to wildfire-related PM<sub>2.5</sub> and the incidence and mortality of respiratory transmitted diseases in children and adolescents.

### Methods and findings

Data on daily counts of incident and mortality cases of respiratory transmitted diseases in persons aged 4–24 years old were collected from China Information System for Disease Control and Prevention, covering 501 cities from 2008 to 2019. Daily concentrations of wildfire-related PM<sub>2.5</sub> were estimated using machine learning and chemical transport models at a 0.25°×0.25° spatial resolution. We used time-stratified case-crossover design with conditional logistic regression to estimate the association between short-term exposures to wildfire-related PM<sub>2.5</sub> and incidence and mortality of respiratory transmitted diseases, adjusting for temperature, relative humidity, precipitation, and total PM<sub>2.5</sub>. There were 6,089,271 incident cases and 1,034 mortality cases of 10 respiratory transmitted diseases included in our analyses. Each 5 µg/m<sup>3</sup>



Family Planning Commission during the study period (<https://www.phsciencedata.cn/Share/#>). Summarized infectious diseases data can be accessed by contacting the Chinese Center for Disease Control and Prevention School/Children's Health Center Office; contact email, [songjieyun@bjmu.edu.cn](mailto:songjieyun@bjmu.edu.cn) (Jieyun Song).

**Funding:** This work was supported by the National Key R&D Program of China (2024YFC3308302, to YHD), the National Natural Science Foundation of China (82103865 and 82373593, to YHD; 82273654, to YS), the Natural Science Foundation of Beijing (7222244, to YHD), and the Peking University Talent Introduction Program Project (BMU2023YJ011, to YHD). The funders had no role in study design, data collection and analysis, decision to publish, or preparation of the manuscript. The authors from Peking University and China CDC had full access to the data.

**Competing interests:** I have read the journal's policy and the authors of this manuscript have the following competing interests: YG serves as an Academic Editor on the PLOS Medicine Editorial Board. All other authors declare no competing interests.

**Abbreviations:** AC, attributable cases; AF, attributable fraction; CISDCP, China Information System for Disease Control and Prevention; DLNM, distributed lag nonlinear model; ORs, odds ratio; PC, percent change;  $PM_{2.5}$ , particulate matter; RH, relative humidity; RR, relative risk.

increase in the lag 0–28-day (average of current day and previous 28 days) for wildfire-related  $PM_{2.5}$  was associated with a 6.8% (95%CI: 5.0%, 8.7%) increase in the daily incidence rate of respiratory transmitted diseases, which is greater than that of a 1.2% (1.0%, 1.4%) increase associated with the same increase of non-wildfire-related  $PM_{2.5}$ . A  $5 \mu g/m^3$  increase in wildfire-related  $PM_{2.5}$  was associated with a 28.6% (21.0%, 36.8%), 5.2% (2.3%, 8.3%), 12.6% (9.5%, 15.8%), and 13.6% (5.6%, 22.2%) increase in the incidence of seasonal influenza, scarlet fever, rubella, and measles, respectively. Although wildfire-related  $PM_{2.5}$  constitutes only 2.7% of the total  $PM_{2.5}$ , it contributes significantly to respiratory transmitted diseases, accounting for 10.8% of all  $PM_{2.5}$ -associated cases. In areas where the annual concentration of wildfire-related  $PM_{2.5}$  is lower than  $1.5 \mu g/m^3$ , the proportion of cases associated with wildfire-related  $PM_{2.5}$  reached 29.7%. Study limitations include potential exposure misclassification from using city-average wildfire  $PM_{2.5}$  as a proxy for individual exposure and an inability to adjust for some potential confounders.

## Conclusions

Short-term exposure to wildfire-related  $PM_{2.5}$  was associated with increased incidence of respiratory transmitted diseases, surpassing the impact observed with non-wildfire-related  $PM_{2.5}$ . This phenomenon is not restricted to regions with high pollutant concentrations; even populations residing in areas with lower concentrations of wildfire-related  $PM_{2.5}$  are at an increased risk of these respiratory conditions. Consequently, there emerges a pressing global imperative to confront the escalating challenges presented by climate change and the intensifying menace of wildfires.

## Author summary

### Why was this study done?

- The health effects of wildfire smoke on respiratory infections, especially among children and adolescents, remain poorly understood.
- Previous research focused mainly on chronic diseases or COVID-19, with limited data on broader respiratory transmitted diseases.
- As climate change intensifies wildfires globally, understanding their impacts on infectious disease burden is urgently needed.

### What did the researchers do and find?

- We analyzed national surveillance data from 501 Chinese cities (2008–2019), covering 6 million respiratory transmitted disease cases in individuals aged 4–24 years.



- Short-term exposure to wildfire-related PM<sub>2.5</sub> significantly increased the incidence of respiratory transmitted diseases (e.g., influenza, scarlet fever, rubella, measles), with stronger effects than non-wildfire PM<sub>2.5</sub>.
- Even in areas with low wildfire pollution, a large proportion of cases was attributable to wildfire-related PM<sub>2.5</sub>.

### What do these findings mean?

- Wildfire-related PM<sub>2.5</sub> is a potent contributor to respiratory transmitted diseases in children and adolescents, beyond regions with obvious wildfire events.
- Findings highlight the need for global climate action and stronger public health responses during wildfire seasons.
- Main limitations: exposure estimates were based on city-level averages, which may not reflect individual exposure; the study was conducted in China, so generalizability to other settings requires caution.

## Introduction

Wildfires, intensifying in both frequency and intensity due to climate change-induced increases in environmental temperature and the frequency of extreme heat days, have posed a serious threat to human health [1–5]. In contrast to the direct thermal exposure experienced during wildfires, the resultant smoke has the capacity to traverse extensive distances, spanning hundreds to thousands of kilometers, driven by atmospheric wind currents [1]. This far-reaching dispersion extends the impact of wildfires beyond the immediate vicinity, encompassing a significantly larger geographical area and consequently affecting a more substantial demographic [6]. Wildfire smoke is a complex mixture containing particulate, gaseous pollutants [7], and microbes [8], with fine particulate matter (PM<sub>2.5</sub>) being of paramount concern due to its capacity to deeply penetrate the lungs and reach the alveoli, thus posing a severe threat to the human respiratory system [9,10]. Relative to PM<sub>2.5</sub> originating from other sources, wildfire-related PM<sub>2.5</sub>, characterized by heightened toxicity—a consequence of its distinct chemical composition and reduced particle size—heightens the propensity for inducing respiratory diseases and other health complications [6,11].

Recent estimations indicate that wildfire-related PM<sub>2.5</sub> exposure is responsible for approximately 0.62% of all-cause mortality in 749 communities across the world each year [12]. Beyond the increased risk of mortality, short-term acute exposure to wildfire smoke significantly escalates the risk of respiratory and cardiovascular diseases [6,13]. Children and adolescents can be more susceptible to environmental hazards than the general adult population. The health impacts of wildfire-related PM<sub>2.5</sub> are more pronounced in children and adolescents, affecting a spectrum of health outcomes including respiratory illnesses, birth outcomes, ocular diseases, skin inflammation, cephalalgia, and a decrease in physical activity levels [14]. The vulnerability of this demographic is further compounded by the underdevelopment of their respiratory and immune systems, rendering them more susceptible to the deleterious effects of wildfire-related PM<sub>2.5</sub>.

The association between exposure to wildfire-related PM<sub>2.5</sub> and infectious diseases remains an under-researched area. Although preliminary studies suggest a potential increase in influenza cases related to wildfire-related PM<sub>2.5</sub> [15], there is a scarcity of comprehensive research in this field. Additionally, research targeting COVID-19 has found that wildfires amplified the effect of short-term exposure to PM<sub>2.5</sub> on COVID-19 cases and deaths [16]. Furthermore, wildfire smoke contains both PM<sub>2.5</sub> and microbes [8], with early studies suggesting microbes may act as potential infectious agents [8]. Exposure to wildfire-related PM<sub>2.5</sub> also increases exposure to microbes. Therefore, the biological plausibility [17,18] and simultaneous exposure to microbes and wildfire-related PM<sub>2.5</sub> [8] lead to a research hypothesis that short-term exposure to wildfire-related PM<sub>2.5</sub> will increase the incidence of respiratory transmitted diseases.

To comprehensively understand the impact of wildfire smoke on the incidence and mortality risks of respiratory transmitted diseases in children and adolescents, we utilized a large-scale China national surveillance among children and



adolescents aged 4–24 years during 2008–2019 to thoroughly assess the relationship between short-term exposure to wildfire-related  $PM_{2.5}$  and non-wildfire-related  $PM_{2.5}$  and the incidence and mortality risk of respiratory transmitted diseases.

## Methods

### Health outcome data

Data pertaining to incident cases and death cases among children and adolescents aged 4–24 years, spanning from 2008 to 2019, were procured from the China Information System for Disease Control and Prevention (CISDCP) [19]. The CISDCP is a nationwide, real-time, internet-based surveillance platform managed by the China CDC. All notifiable infectious diseases are required to be diagnosed according to national diagnostic guidelines issued by the National Health Commission and reported by certified clinicians within 24 hours of confirmation. Reported cases undergo multi-tiered verification at local, provincial, and national CDC levels to ensure diagnostic accuracy and data integrity [20]. Routine audits and quality assurance procedures make consistency across regions. This dataset encompassed comprehensive details on each case, including their place of residence, age, sex, as well as dates of onset of symptoms, diagnosis, and clinical outcomes, inclusive of death where applicable. The data specifically focused on 10 notified distinct respiratory transmitted diseases: seasonal influenza, mumps, tuberculosis, scarlet fever, rubella, pertussis, measles, meningococcal meningitis, leprosy, and diphtheria. A summary of the diagnostic criteria is provided in [S1 Text](#). In this study, incidence was defined as the daily number of newly diagnosed cases—capturing both outpatient and inpatient encounters—reported to the CISDCP in accordance with national surveillance protocols. Each report reflected a clinician-confirmed diagnosis following standardized national criteria. Recurrent infections were considered distinct events if they occurred beyond the same disease episode duration and were reported as new cases. Multiple encounters within a single disease episode were recorded as a single event. Mortality was defined as cause-specific death attributed to the diagnosed infectious disease, as recorded in the CISDCP. All deaths were certified by licensed clinicians and reported through the national notifiable disease reporting system. The cause of death corresponds to the primary diagnosis that initiated the reporting, in accordance with national surveillance protocols. The rationale behind selecting the age range of 4–24 years was twofold: it commenced from the typical kindergarten enrollment age of 4 years, thereby encapsulating the educational monitoring phase, and extended to the upper boundary of 24 years, a threshold consistent with the United Nations’ definition of “youth” (15–24 years old) [21]. This demarcation was strategically chosen to ensure a comprehensive inclusion of the educational age range within our study—based on practical considerations of data accessibility and nationwide comparability—thereby enhancing the relevance of our findings to the specific context of China and potentially extending its applicability to analogous nations. Cases emanating from Hong Kong, Macao, Taiwan China, and other nations lacking authenticated records were excluded from our study.

The research encompassed an aggregate of 501 Chinese prefecture-level cities (S1 Fig), exceeding the 333 officially designated prefecture-level divisions. This broader definition incorporated urban districts of centrally administered municipalities (Beijing, Shanghai, Tianjin, and Chongqing), provincial sub-prefecture units (such as special economic zones), and county-level cities under direct provincial administration. These administrative units were treated as distinct cities to match the spatial resolution of both the disease surveillance data and the population-weighted exposure estimates. This was contingent upon the accessibility of incidence and mortality data pertaining to legally notified infectious diseases. Data on daily incident and mortality counts, encompassing respiratory-related cases, were aggregated across the 501 Chinese prefecture-level regions. Ethical approval was not required for this analysis of anonymous data.

### Data sources and exposure assessment

As detailed previously [22], we estimated global daily landscape fire-sourced outdoor fine particulate matter ( $PM_{2.5}$ ) at  $0.25^\circ \times 0.25^\circ$  spatial resolution (about  $28 \text{ km} \times 28 \text{ km}$  at the equator) during 2000–2019 using a combination of the



GEOS-Chem chemical transport model and machine learning calibration. Briefly, wildfire-specific  $PM_{2.5}$  was estimated as the difference between two GEOS-Chem simulations—one including wildfire emissions and one excluding them. Total  $PM_{2.5}$  outputs from GEOS-Chem (original resolution  $2.0^\circ \times 2.5^\circ$ ) were downscaled to  $0.25^\circ \times 0.25^\circ$  resolution using inverse distance weighting to match meteorological and auxiliary data grids. A random forest machine learning model was then trained to calibrate GEOS-Chem total  $PM_{2.5}$  estimates against ground-based daily  $PM_{2.5}$  measurements, using meteorological variables (temperature, relative humidity (RH), wind speed, precipitation, pressure, UV radiation) and spatiotemporal factors (longitude, latitude, day of year, day of week, month, year). The calibrated wildfire-specific  $PM_{2.5}$  was obtained by multiplying the calibrated total  $PM_{2.5}$  by the GEOS-Chem wildfire-to-total  $PM_{2.5}$  ratio in each grid cell. Model validation was conducted using 10 well-documented large wildfire events across the USA, Australia, Portugal, Chile, and South Africa, demonstrating strong agreement between predicted wildfire  $PM_{2.5}$  and observed  $PM_{2.5}$  peaks and temporal trends, particularly during fire episodes. Non-wildfire  $PM_{2.5}$  was calculated as the difference between calibrated total  $PM_{2.5}$  and wildfire-specific  $PM_{2.5}$ . We derived hourly meteorological data at  $0.25^\circ \times 0.25^\circ$  spatial resolution from the fifth-generation European Centre for Medium-Range Weather Forecasts reanalysis [23]. Hourly records were used to calculate daily meteorological parameters according to local time zone of each grid. These daily meteorological parameters included daily mean 2 m (i.e., at 2 m above the surface of the earth) ambient temperature ( $T_{\text{mean}}$  was calculated from 24 hourly records of 2 m ambient temperature), daily mean 2 m dew point temperature ( $T_{\text{dew\_mean}}$ ), daily total precipitation, daily mean surface air pressure. Daily mean RH was calculated from  $T_{\text{mean}}$  and  $T_{\text{dew\_mean}}$  using the humidity R package [24]. We collected annual population counts data at 30 arc seconds (about 1 km<sup>2</sup>) spatial resolution across the globe during 2000–2019 from the WorldPop project [25]. We aggregated the gridded population counts to  $0.25^\circ \times 0.25^\circ$  spatial resolution to match the air pollution data. For each day, city-level daily  $PM_{2.5}$  and weather variables were calculated by averaging the daily exposure of all  $0.25^\circ \times 0.25^\circ$  grids within the city boundary weighted by population size of each grid.

## Statistical analysis

### Assessing the wildfire-related $PM_{2.5}$ -incidence/mortality association

The time-stratified case-crossover design was employed to explore the potential association between short-term wildfire-related  $PM_{2.5}$  exposure and incidence and mortality of all respiratory transmitted diseases and specific respiratory diseases. This design involved comparing the daily average wildfire-related  $PM_{2.5}$  levels during the risk period with corresponding control periods within the same city [26–28]. Control periods were meticulously identified, ensuring alignment with the day of the week in the identical calendar month and year corresponding to the observed incidence and mortality cases. Each case was systematically paired with three to four control periods, facilitating a comprehensive analysis that accounted for both time-varying elements such as temporal trends and weekdays, and time-invariant factors including individual demographics (e.g., sex, age, lifestyles), disease types, and the socio-environmental fabric of the respective cities.

We utilized a conditional logistic regression model to examine the relationship between wildfire-related  $PM_{2.5}$  concentration and incidence/mortality rates. Wildfire-related  $PM_{2.5}$  concentration served as the independent variable, while the dependent variable was a binary indicator (1 = case, 0 = control) distinguishing observations as either cases or controls. To examine the lag structure of the association between wildfire-related  $PM_{2.5}$  exposure and respiratory transmitted diseases, a distributed lag nonlinear model (DLNM) was used. Preliminary analysis indicated that this association persisted for up to 28 days. We employed both linear and non-linear (B-spline with 3 degrees of freedom,  $df = 3$ ) function in the exposure–response dimension and a natural cubic spline with three degrees of freedom for the lag–response relationship over a period of 0–28 days. This lag window aligns with the incubation periods of most included diseases, such as seasonal influenza (1–7 days), mumps (2–4 weeks), scarlet fever (1–12 days), rubella (14–21 days), measles (7–14 days), pertussis (7–14 days), and meningococcal meningitis (2–10 days), supporting its biological plausibility.

The placement of knots in the lag–response dimension was determined by equally spaced values on a logarithmic scale, as per the “logknots” function in the “dlnm” package. The number of knots was set to the degrees of freedom minus



one. In the DLNM framework, odds ratio (ORs) were estimated using a linear exposure–response function, relative to a reference value of 0  $\mu\text{g}/\text{m}^3$  wildfire-related  $\text{PM}_{2.5}$ , which served as the centering value in the cross-prediction function. Cumulative ORs were computed across the lag period with this same reference. The model also accounted for mean temperature, daily RH, and daily precipitation (all at lag 0 days) by incorporating them with a natural cubic spline of three degrees of freedom, to control for their potential nonlinear impacts. Additionally, total  $\text{PM}_{2.5}$  concentrations on lag 0 days were adjusted in the model.

The model is formalized as:

$$\begin{aligned} \text{logit}(P(\text{case} = 1 | \text{Wildfire } \text{PM}_{2.5}, \text{temp}, \text{RH}, \text{precipitation}, \text{total\_PM}_{2.5})) &= \alpha_{\text{stratum}ij} \\ &+ \text{cb}(\text{Wildfire } \text{PM}_{2.5}) + \text{ns}(\text{tmean}, \text{df} = 3) + \text{ns}(\text{RH}, \text{df} = 3) + \text{ns}(\text{precipitation}, \text{df} = 3) \\ &+ \beta \times \text{total\_PM}_{2.5} \end{aligned}$$

Here,  $\alpha_{\text{stratum}ij}$ : stratum-specific intercept, accounting for the matched design in the time-stratified case-crossover analysis.  $\text{cb}(\text{Wildfire } \text{PM}_{2.5})$ : cross-basis function combining a linear exposure–response function and a natural cubic spline ( $\text{df} = 3$ ) for lag–response over a 0–28 day lag period.  $\text{ns}(\text{tmean}, \text{df} = 3)$ ,  $\text{ns}(\text{RH}, \text{df} = 3)$ ,  $\text{ns}(\text{precipitation}, \text{df} = 3)$ : natural cubic splines controlling for potential non-linear effects of temperature, RH, and precipitation.  $\text{total\_PM}_{2.5}$ : daily mean total  $\text{PM}_{2.5}$  concentration at lag 0.

Our investigation incorporated stratified analyses to assess the impact of wildfire-related  $\text{PM}_{2.5}$  across diverse demographics and environmental conditions. The stratification criteria included gender (female and male), age categories (4–9, 9–12, 12–15, 15–18, and 18–24 years), the four meteorological seasons (spring, summer, autumn, and winter), and regions categorized by high or low levels of wildfire-related  $\text{PM}_{2.5}$ . Regions with an annual mean wildfire-related  $\text{PM}_{2.5}$  concentration of 1.5  $\mu\text{g}/\text{m}^3$  or higher during 2008–2019 were classified as high exposure areas, while those with concentrations below this threshold were classified as low exposure areas. The selection of the 1.5  $\mu\text{g}/\text{m}^3$  threshold primarily derives from the distributional analysis conducted within the scope of the present study. Specifically, this threshold delineates regions wherein approximately 50% of the area exhibits exposure levels to wildfire-related  $\text{PM}_{2.5}$  surpassing the aforementioned concentration. We applied separate conditional logistic regression models for each subgroup to derive subgroup-specific ORs estimates, thus facilitating a nuanced understanding of the differential impacts of wildfire-related  $\text{PM}_{2.5}$  exposure across various population segments and environmental contexts.

Calculating the attributable fraction (AF) of incidence cases due to wildfire-related  $\text{PM}_{2.5}$

For AF calculations only, the OR obtained from our case-crossover analysis is interpretable as a relative risk (RR), as the control selection scheme based on density sampling leads to control times that represent the average exposure in the study population [29,30]. The RR quantified the likelihood of an incidence or mortality event happening for each 5-unit increase in the daily mean concentration, which aligns with previous studies and ensures comparability across exposure contexts, including during high-exposure wildfire events [31,32]. The RRs were further represented as percent change (PC):  $\text{PC} = (\text{RRs} - 1) \times 100\%$ .

To determine the annual number of attributable incidence cases/deaths of infectious diseases associated with wildfire-related  $\text{PM}_{2.5}$ , we used the formula to calculate the attributable cases (AC) of day  $i$ :  $\text{AC}_i = [(\exp(\beta \times \Delta x) - 1) / \exp(\beta \times \Delta x)] \times \text{Ci}$ . Here,  $\beta$  represents the  $\log(\text{RR})$  denoting the cumulative RR over specific lag days associated with a unit increase in wildfire-related  $\text{PM}_{2.5}$  on each day.  $\text{Ci}$  represents the city-specific average of incidence cases from the day to the day with specific lag days.  $\Delta x$  represents the differences between the mean daily wildfire  $\text{PM}_{2.5}$  concentration across the cities and the 0  $\mu\text{g}/\text{m}^3$ . The total number of AC was obtained by summing the  $\text{AC}_i$  values over the study period. Then, we calculated the attributable annual incidence rate by dividing the total AC by the mean population and the number of years covered by the study period specific to each city.



We also applied the same modeling process to  $PM_{2.5}$  originating from non-wildfire sources (non-wildfire-related  $PM_{2.5}$ ). We calculated the annual number of attributable incidence cases and deaths from infectious diseases associated with non-wildfire-related  $PM_{2.5}$  using  $0 \mu g/m^3$  as the counterfactual (reference) concentration. Furthermore, we estimated the total number of cases attributable to  $PM_{2.5}$  (including non-wildfire-related  $PM_{2.5}$  and wildfire-related  $PM_{2.5}$ ) in general and specifically discerned the proportion of these cases that could be uniquely attributed to wildfire-related  $PM_{2.5}$  exposure.

## Sensitivity analyses

To test whether 28 days were sufficient to capture the lag effects of wildfire-related  $PM_{2.5}$ , our study implemented sensitivity analyses that varied the maximum lag for wildfire-related  $PM_{2.5}$ . These analyses included adjustments to the initial 28-day period, shortening it to 14 days and extending it from 21 to 35 days. Additionally, to test the robustness of our results, we modified the degrees of freedom for meteorological variables to 4, 5, and 6. Furthermore, the meteorological variables at lag 0 were compared with the moving averages of these variables during the 0–28 day lag period.

To mitigate potential exposure misclassification arising from the spatial resolution of the exposure grid, we performed a sensitivity analysis restricted to large cities, defined as those with both a geographic area  $>500 \text{ km}^2$  and a population  $>1$  million. To determine the statistical significance of differences in the estimated ORs across these varied sensitivity analyses, we implemented a univariate fixed-effects meta-regression. This technique was crucial in identifying any potential statistical discrepancies among the results. Essentially, our approach entailed constructing models that incorporated effect estimates from different sensitivity analyses alongside their respective standard errors (SEs), correlated with meta-predictors. The meta-regression model then facilitated the assessment of differences in effect estimates between strata using the likelihood ratio test.

We used R software (version 4.2.2) to perform all data analyses. The packages “gmm,” “dlnm,” and “mvmeta” were used to fit conditional logistic regression, distributed lag linear or non-linear model, and meta-regression model, respectively. A two-sided  $p$  value less than 0.05 was considered to be statistically significant.

## Results

### Descriptive statistics

This study included 6,089,271 incident cases (female, 65.6%; male, 34.6%) and 1,034 death cases (female, 47.1%; male, 52.9%) during 2008–2019. Among these incident cases, seasonal influenza was identified as the predominant infectious disease, with the largest number of cases at 2,255,929 and a median age of 9.6 years, followed by mumps (2,155,598 cases with a median age of 9.8), tuberculosis (1,074,814 cases with a median age of 19.1), scarlet fever (294,059 cases with a median age of 7.3), rubella (256,061 cases with a median age of 13.8), measles (45,278 cases with a median age of 12.0), pertussis (5,722 cases with a median age of 7.6), meningococcal meningitis (1,405 cases with a median age of 13.0), and leprosy (405 cases with a median age of 18.0). Among mortality cases, tuberculosis was the most common cause of death, with 708 cases and a median age of 19 years, followed by seasonal influenza, meningococcal meningitis, measles, mumps, and scarlet fever, each contributing to the overall mortality figures with varying case numbers (Tables 1 and S1 Table). The spatial distribution of the incident cases and death cases is visualized in Figs 1 and S2.

In China, the average total  $PM_{2.5}$  concentration was measured at  $49.6 \mu g/m^3$ , with wildfire-related  $PM_{2.5}$  contributing approximately  $1.3 \mu g/m^3$ , equating to about 2.7% of the total. Observing the long-term yearly mean distributions, there is a notable divergence in the trends of wildfire-related and non-wildfire-related  $PM_{2.5}$  (S3 Fig and S2 Table). The areas most impacted by wildfire-related  $PM_{2.5}$  include the northeastern and southwestern regions, along with select coastal zones within China. Conversely, the central regions of China are predominantly affected by higher concentrations of non-wildfire-related  $PM_{2.5}$  (Fig 1).



**Table 1. Descriptive of specific-cause respiratory transmitted diseases counts in China.**

|                                          | Incidence case |           |           |     |        |      | Incidence case |        |      |     |        |      |
|------------------------------------------|----------------|-----------|-----------|-----|--------|------|----------------|--------|------|-----|--------|------|
|                                          | Number         | Female    | Male      | Age |        |      | Number         | Female | Male | Age |        |      |
|                                          |                |           |           | Min | Median | Max  |                |        |      | Min | Median | Max  |
| Overall respiratory transmitted diseases | 6,089,271      | 3,996,589 | 2,092,682 | —   | —      | —    | 1,034          | 487    | 547  | —   | —      | —    |
| Seasonal influenza                       | 2,255,929      | 1,252,309 | 1,003,620 | 4.9 | 9.6    | 23.0 | 214            | 134    | 80   | 6   | 17     | 23.0 |
| Mumps                                    | 2,155,598      | 1,525,348 | 630,250   | 4.2 | 9.8    | 23.0 | 3              | 1      | 2    | 6   | 13.5   | 22.4 |
| Tuberculosis                             | 1,074,814      | 762,876   | 311,938   | 4.9 | 19.1   | 23.0 | 708            | 311    | 397  | 5.9 | 19     | 23   |
| Scarlet fever                            | 294,059        | 199,347   | 94,712    | 5.0 | 7.3    | 23.0 | 3              | 1      | 2    | 6   | 12     | 13   |
| Rubella                                  | 256,061        | 209,991   | 46,070    | 4.8 | 13.8   | 23.0 | —              | —      | —    | —   | —      | —    |
| Measles                                  | 45,278         | 41,613    | 3,665     | 5.0 | 12.0   | 23.0 | 15             | 5      | 10   | 6.3 | 8      | 22.3 |
| Pertussis                                | 5,722          | 3,693     | 2,029     | 5.3 | 7.6    | 22.9 | —              | —      | —    | —   | —      | —    |
| Meningococcal meningitis                 | 1,405          | 1,132     | 273       | 5.7 | 13.0   | 23.0 | 91             | 35     | 56   | 5.7 | 12     | 21.8 |
| Leprosy                                  | 405            | 280       | 125       | 6.0 | 18.0   | 22.8 |                |        |      |     |        |      |

<https://doi.org/10.1371/journal.pmed.1004613.t001>

## Associations by different respiratory transmitted diseases

We observed that exposure to wildfire-related  $PM_{2.5}$  was associated with a lower incidence of overall respiratory diseases in the first 6 days, and the risk of incidence increased from day 6 to 28. Thereafter, the associations gradually attenuated and became statistically nonsignificant after 28 days (S4 Fig). Consequently, we decided to use the duration of 0 to 28 days to derive the risk estimates. Similarly, for mortality, we utilized the same lag duration to determine the risk estimates.

Every 5  $\mu\text{g}/\text{m}^3$  increase in the concentrations of wildfire-related  $PM_{2.5}$  was associated with a 6.8% increase (95% CI: 5.0%, 8.7%) in the incidence of overall respiratory transmitted diseases. Additionally, this increase in wildfire-related  $PM_{2.5}$  was associated with a 28.6% (95% CI: 21.0%, 36.8%), 5.2% (95% CI: 2.3%, 8.3%), 12.6% (95% CI: 9.5%, 15.8%), and 13.6% (95% CI: 5.6%, 22.2%) increase in the incidence of seasonal influenza, scarlet fever, rubella, and measles, respectively.

Conversely, every 5  $\mu\text{g}/\text{m}^3$  increase in non-wildfire-related  $PM_{2.5}$  was linked to a 1.2% (95% CI: 1.0%, 1.4%) increment in the overall incidence of respiratory transmitted diseases. This increase in non-wildfire-related  $PM_{2.5}$  also showed correlations with specific diseases: a 2.3% (95% CI: 2.0%, 2.6%) increase for seasonal influenza, a 0.4% (95% CI: 0.2%, 0.7%) rise for mumps, an 8.9% (95% CI: 2.6%, 15.6%) augmentation for meningococcal meningitis, and a 20.5% (95% CI: 0.3%, 44.0%) escalation for leprosy. Null associations were observed between death cases and exposure to both wildfire-related and non-wildfire-related  $PM_{2.5}$  (Fig 2).

We evaluated the non-linear relationship between exposure to wildfire-related  $PM_{2.5}$  and the incidence of overall respiratory transmitted diseases, as depicted in Fig 3. This evaluation highlighted concentration–response associations, demonstrating positive non-linear curves between daily levels of wildfire-related  $PM_{2.5}$  and the incidence of respiratory transmitted diseases. These curves consistently showed an increase in incidence rates with no apparent thresholds. Notably, the slope of these curves varied in response to different concentrations of wildfire-related  $PM_{2.5}$  during short-term exposures. Specifically, at wildfire-related  $PM_{2.5}$  levels below 3  $\mu\text{g}/\text{m}^3$ , the slope was observed to be steeper, whereas it became more gradual at higher concentration ranges. Given the rarity of wildfire-related  $PM_{2.5}$  concentrations >5  $\mu\text{g}/\text{m}^3$ , estimates in this range reflect sparse data and should be interpreted as indicative of extreme exposure scenarios only.

## Stratified analyses for the estimated associations

We examined whether the estimated association between non-wildfire-related and wildfire-related  $PM_{2.5}$  and overall respiratory transmitted diseases differed among subpopulations. Our findings indicated a pronounced gender-based susceptibility, with males exhibiting a higher susceptibility (19.9% [95% CI: 14.8%, 25.2%]) to the adverse effects of wildfire-related



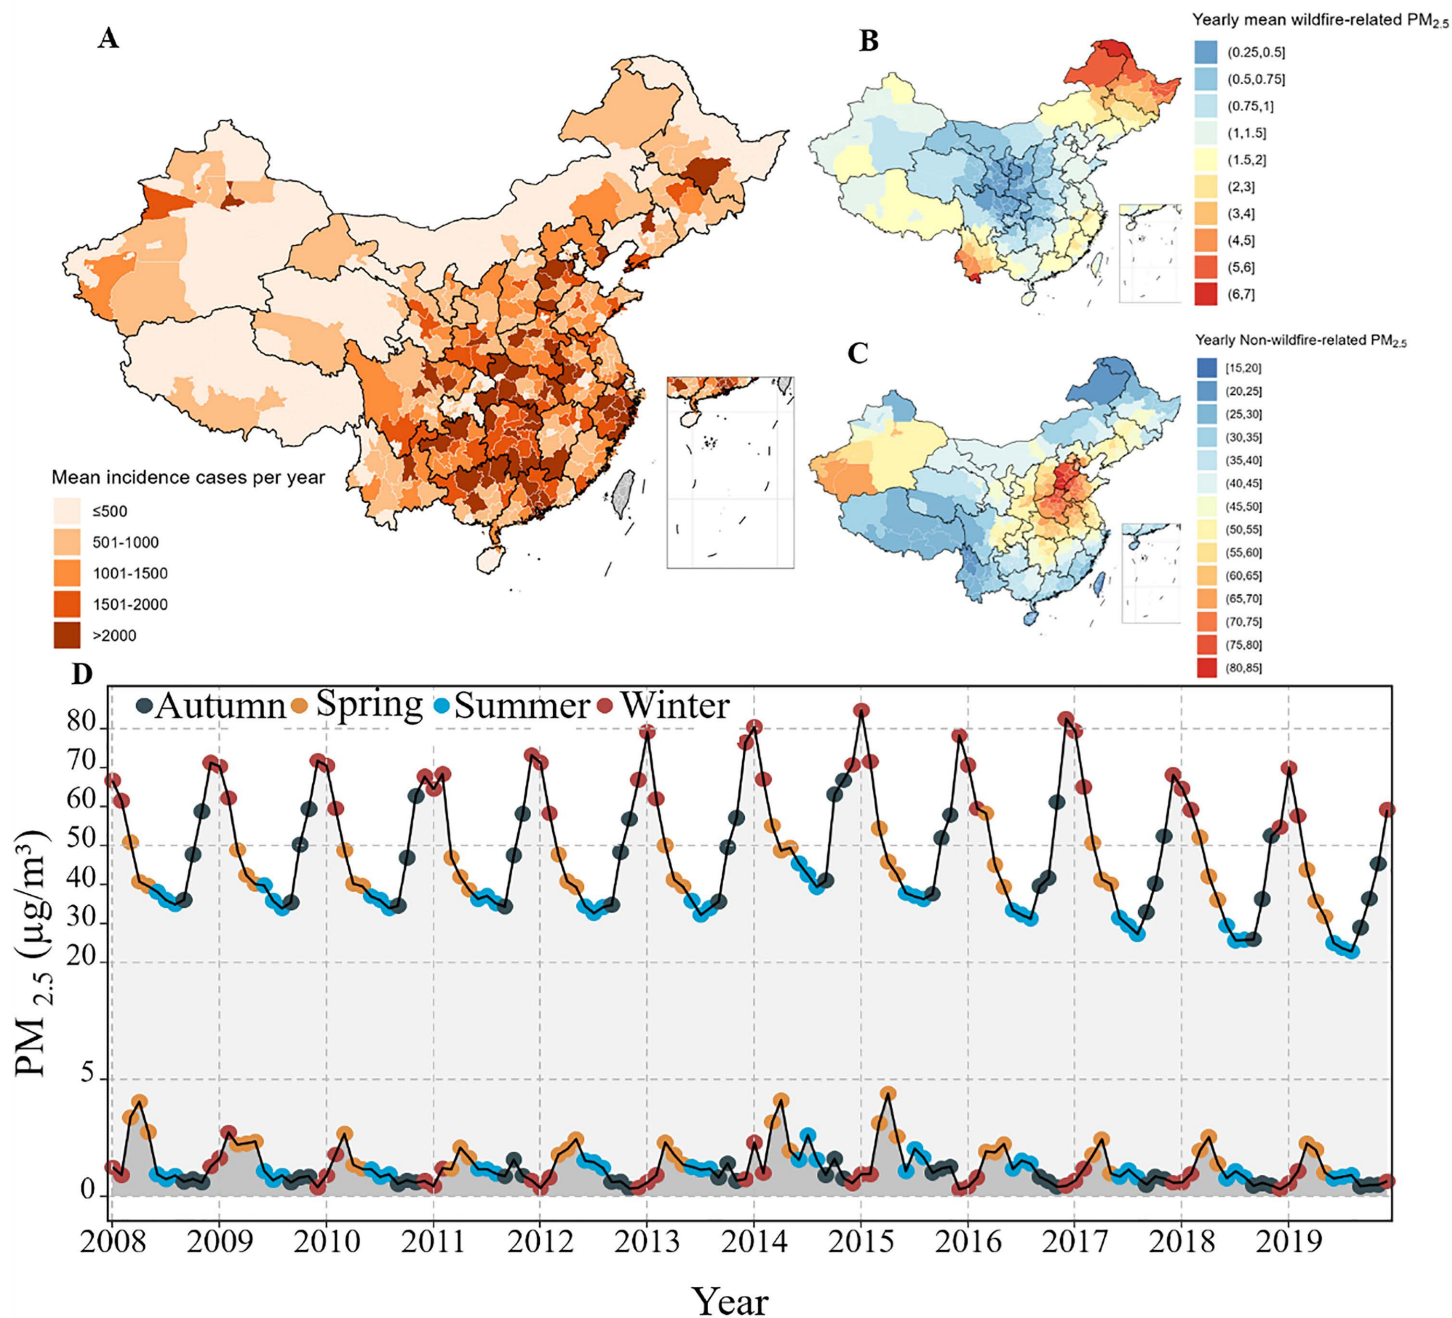

**Fig 1. Annual spatial distribution of incidence cases and concentrations of wildfire-related vs. non-wildfire-related  $PM_{2.5}$ , with temporal trends.** Panel A presents the mean number of incident cases from 2008 to 2019; Panel B shows the population-weighted means of wildfire-related  $PM_{2.5}$ ; Panel C displays the population-weighted means of non-wildfire-related  $PM_{2.5}$ ; and Panel D illustrates the monthly population-weighted means of both wildfire-related (the lower line) and non-wildfire-related  $PM_{2.5}$  (the higher line).  $PM_{2.5}$  refers to particulate matter with a diameter of less than 2.5 micrometers. Notes; Spatial boundaries were retrieved from Natural Earth (<https://www.naturalearthdata.com/>) using the “naturalearth” package (<https://github.com/ropenscilabs/rnaturalearth>).

<https://doi.org/10.1371/journal.pmed.1004613.g001>



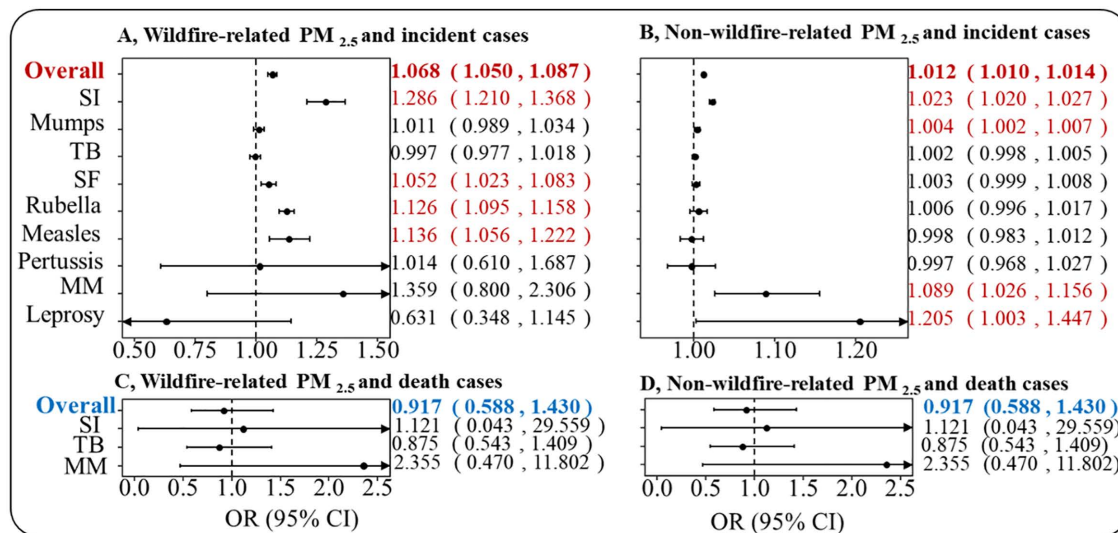

**Fig 2. Estimated associations between respiratory infectious cases and death and wildfire-related or non-wildfire-related PM<sub>2.5</sub> exposure (every 5  $\mu\text{g}/\text{m}^3$  increase).** Notes: Subfigure A presents the estimated association between incident cases of respiratory infections and wildfire-related PM<sub>2.5</sub>; Subfigure B presents the estimated association between incident cases of respiratory infections and non-wildfire-related PM<sub>2.5</sub>; Subfigure C presents the estimated association between death cases of respiratory infections and wildfire-related PM<sub>2.5</sub>; Subfigure D presents the estimated association between death cases of respiratory infections and non-wildfire-related PM<sub>2.5</sub>. SI, Seasonal influenza; TB, Tuberculosis; SF, Scarlet fever; MM, Meningococcal meningitis. Models are time-stratified case-crossover (conditional logistic regression) adjusted for daily mean temperature, relative humidity, precipitation, and total PM<sub>2.5</sub>.

<https://doi.org/10.1371/journal.pmed.1004613.g002>

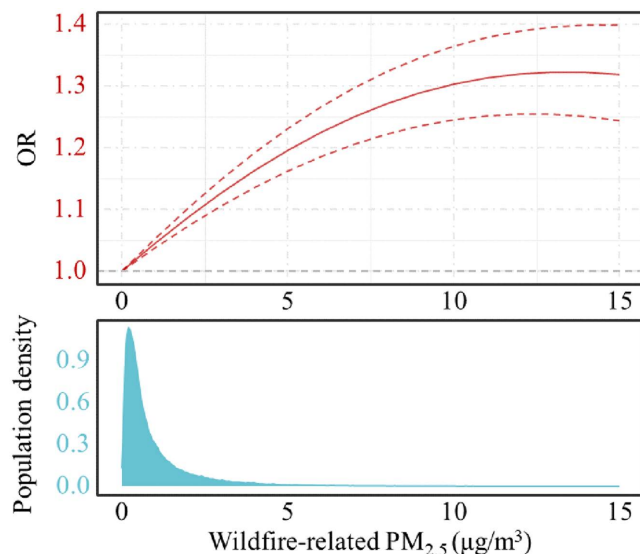

**Fig 3. Estimated nonlinear associations between wildfire-related PM<sub>2.5</sub> and respiratory transmitted diseases.** Notes: The figure above illustrates the estimated non-linear association between wildfire-related PM<sub>2.5</sub> and respiratory transmitted disease. The figure below depicts the population density of wildfire-related PM<sub>2.5</sub> in the current study. Models are time-stratified case-crossover (conditional logistic regression) adjusted for daily mean temperature, relative humidity, precipitation, and total PM<sub>2.5</sub>.

<https://doi.org/10.1371/journal.pmed.1004613.g003>



PM<sub>2.5</sub> compared to females (4.7% [95% CI: 3.1%, 6.4%]). Among the different age groups, children and adolescents aged 9–12 years showed the greatest vulnerability to the adverse effects of wildfire-related PM<sub>2.5</sub>, with an increase of 8.9% (95% CI: 5.9%, 11.9%). Additionally, the age groups of 4–9 years and 12–15 years also demonstrated heightened susceptibility to these effects, with increases of 7.3% (95% CI: 4.8%, 10.0%) and 7.7% (95% CI: 4.5%, 11.0%), respectively (S5 Fig). The stratified analysis for the seasonal influenza, scarlet fever, rubella, and measles shown in S6 Fig.

Our analysis incorporated stratified assessments based on the four meteorological seasons to evaluate the impact of PM<sub>2.5</sub>. The findings indicated that the adverse effects of wildfire-related PM<sub>2.5</sub> were most pronounced during the autumn season, with the highest OR value of 1.519 (95%CI: 1.431, 1.612), as illustrated in S5A Fig. Notably, this occurred despite the concentration of wildfire-related PM<sub>2.5</sub> being the lowest among the four seasons (as shown in Fig 1D). In contrast, the impact of non-wildfire-related PM<sub>2.5</sub> during the autumn and summer seasons displayed similar patterns of adverse effects, as depicted in S5B Fig.

The stratified analysis, differentiated by regions with high or low levels of wildfire-related PM<sub>2.5</sub>, revealed that the adverse effects of wildfire-related PM<sub>2.5</sub> were more pronounced in regions with low levels of this pollutant, exhibiting an OR of 1.284 (95% CI: 1.239, 1.331). In contrast, the adverse effects of non-wildfire-related PM<sub>2.5</sub> were greater in regions with high levels of wildfire-related PM<sub>2.5</sub>, with an OR of 1.021 (95% CI: 1.016, 1.027).

### Comparative impacts from wildfire-related and non-wildfire-related PM<sub>2.5</sub>

Fig 4 illustrated the comparative analysis of the impacts attributed to wildfire-related PM<sub>2.5</sub> versus non-wildfire-related PM<sub>2.5</sub>. It was discerned that wildfire-related PM<sub>2.5</sub> bears a greater significance in public health, despite the fact that high-concentration exposure to wildfire-related PM<sub>2.5</sub> is less common compared to non-wildfire-related PM<sub>2.5</sub> (as indicated in Fig 1B and 1C). The analysis underscores that while wildfire-related PM<sub>2.5</sub> constitutes only 2.7% of the total PM<sub>2.5</sub>, it contributes significantly to respiratory transmitted diseases, accounting for 10.8% of all PM<sub>2.5</sub>-associated cases. Particularly for seasonal influenza, the proportion of cases associated with wildfire-related PM<sub>2.5</sub> reaches 14.3% of the total PM<sub>2.5</sub>-associated respiratory transmitted diseases. Furthermore, the incidence of cases associated with wildfire-related PM<sub>2.5</sub> varies across different genders and age groups. In regions with lower levels of wildfire-related PM<sub>2.5</sub> (29.7%), the proportion of associated cases is greater than that in regions with higher levels (3.7%). The distribution of the proportion of cases related to wildfire-related PM<sub>2.5</sub> was calculated based on the regional variations in wildfire-related PM<sub>2.5</sub> levels. The distribution of the proportion based on the national estimated association shown in S7 Fig.

The robustness of the findings was demonstrated through sensitivity analyses, which involved changing the maximum lag time for wildfire-related PM<sub>2.5</sub> to 27, 29, 30, and 31 days. We also adjusted the degrees of freedom for meteorological variables to 4, 5, and 6, and compared meteorological variables at lag 0 with their averages over a 0–28 day period. These analyses, detailed in S3 Table, ensured the reliability of our findings and for assessing the potential variability in our results under different analytical conditions.

## Discussion

### Principal findings

Leveraging a comprehensive nationwide surveillance dataset spanning 12 years, our study established a significant correlation between exposure to wildfire-related PM<sub>2.5</sub> and an elevated incidence of respiratory transmitted diseases. However, no significant association with mortality was observed. We found that exposure to wildfire-related PM<sub>2.5</sub> was significantly associated with increased incidence in respiratory transmitted diseases, and specific diseases including seasonal influenza, scarlet fever, rubella, and measles at a national level, but the associations varied across different demographics, seasons, and geographical regions.



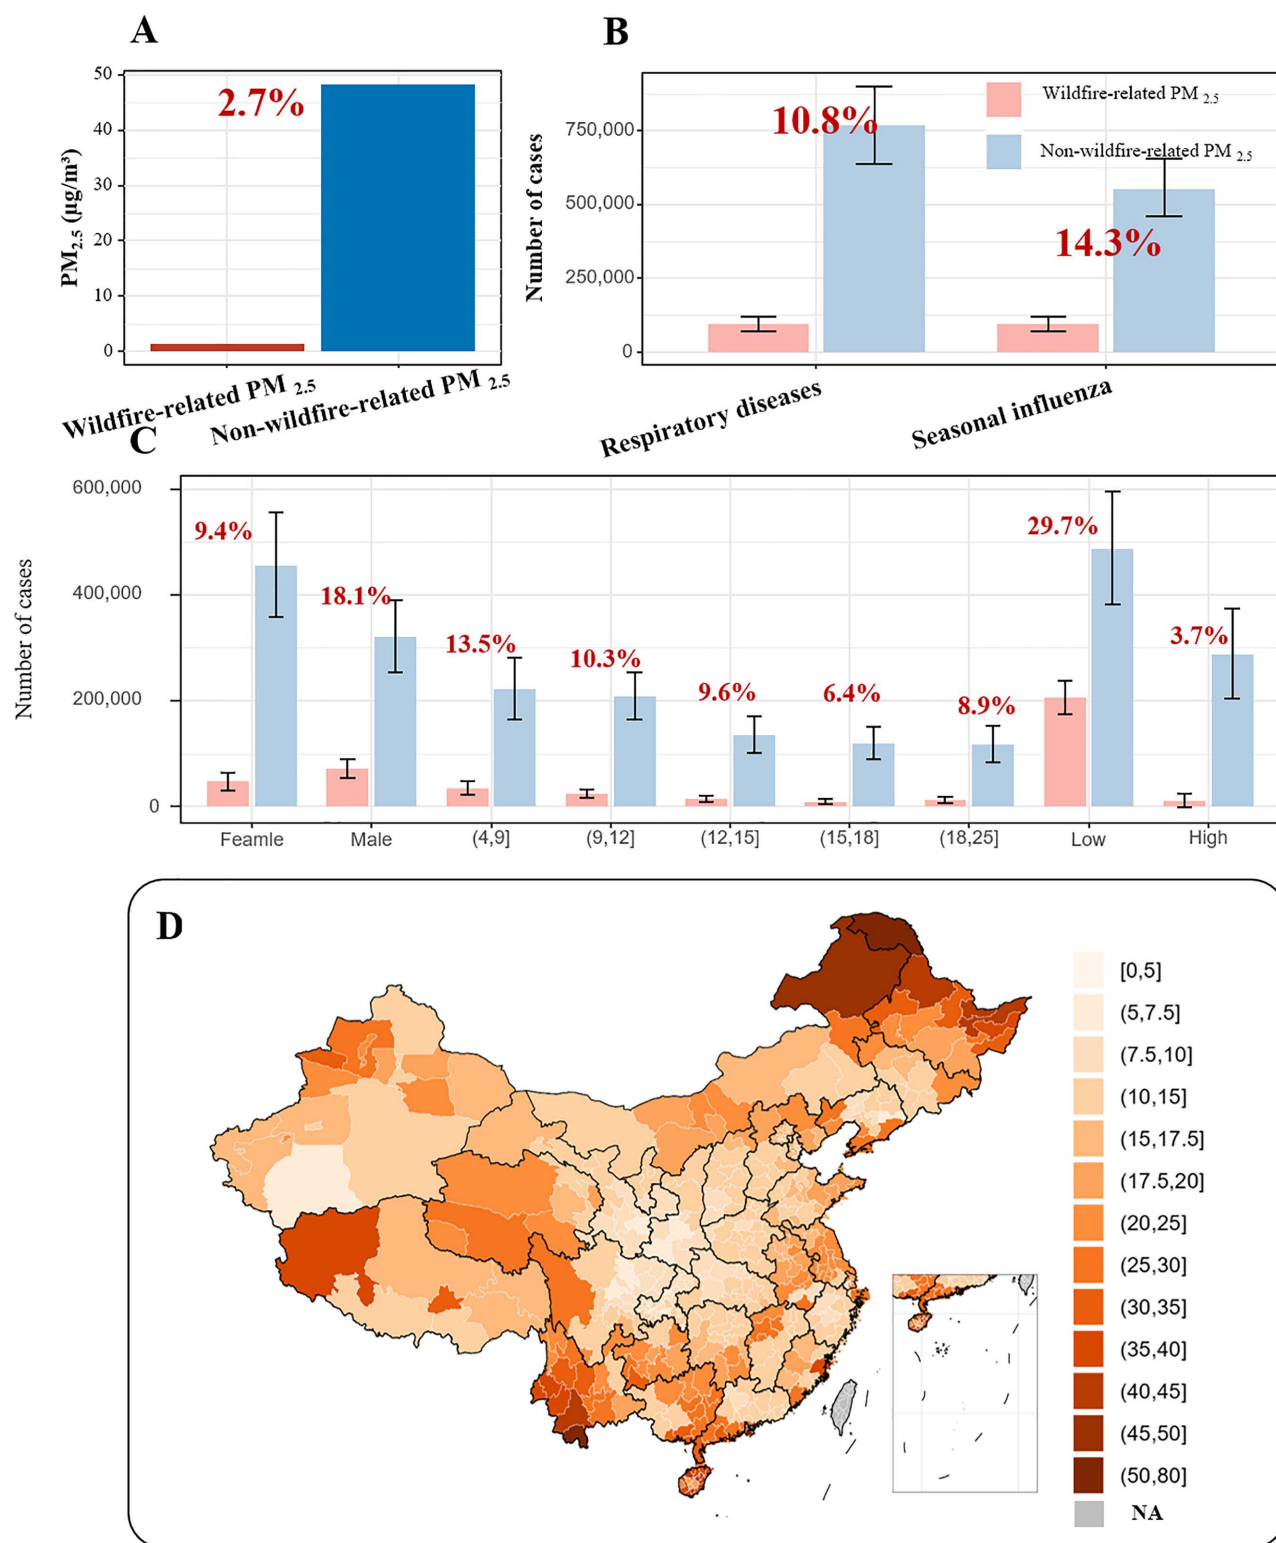

**Fig 4. Health impacts of PM<sub>2.5</sub> from wildfire and non-wildfire sources.** Notes: Proportion indicates the contribution of wildfire-related PM<sub>2.5</sub> to PM<sub>2.5</sub>-linked respiratory transmitted diseases. Subfigure A displays the proportion of wildfire-related PM<sub>2.5</sub> and non-wildfire-related PM<sub>2.5</sub> in total PM<sub>2.5</sub>. Subfigure B illustrates the number of respiratory transmitted diseases and specific diseases (e.g., seasonal influenza), along with the proportion of attributable



cases from wildfire-related  $PM_{2.5}$ , defined as [attributable to wildfire-related  $PM_{2.5}$ ] + ([attributable to wildfire-related  $PM_{2.5}$ ] + [attributable to non-wildfire-related  $PM_{2.5}$ ]). Subfigure **C** presents the number of respiratory transmitted diseases and their proportions attributed to wildfire-related  $PM_{2.5}$  and non-wildfire-related  $PM_{2.5}$ , categorized by gender groups, age groups, and high or low exposure areas. Subfigure **D** shows the proportion of respiratory transmitted diseases attributed to wildfire-related  $PM_{2.5}$  by provinces. “NA” denotes provinces/diseases with unavailable data. Spatial boundaries were retrieved from Natural Earth (<https://www.naturalearthdata.com/>) using the “rnaturalearth” package (<https://github.com/ropenscilabs/rnaturalearth>).

<https://doi.org/10.1371/journal.pmed.1004613.g004>

By comparison, we found that wildfire-related  $PM_{2.5}$  had stronger effects on the respiratory transmitted diseases than other source  $PM_{2.5}$ , with a 6.8% increase in incidence of overall infectious diseases for wildfire-related  $PM_{2.5}$  and a 1.2% increase in incidence of overall infectious diseases for non-wildfire-related  $PM_{2.5}$ . And compared with non-wildfire-related  $PM_{2.5}$ , wildfire-related  $PM_{2.5}$  only accounted 2.7% of total  $PM_{2.5}$ , while accounting for 14.7% of all  $PM_{2.5}$ -associated cases. These findings likely reflect both the episodic nature and higher toxicity of wildfire-related  $PM_{2.5}$ , consistent with prior evidence [12,32,33]. Wildfire-related  $PM_{2.5}$  differs in chemical composition from urban background  $PM_{2.5}$ ; it contains higher fractions of organic carbon, polycyclic aromatic hydrocarbons, black carbon, and reactive oxygen species, which have been shown to induce stronger oxidative stress, inflammation, and immune dysfunction [34,35]. Previous studies have demonstrated that wildfire  $PM_{2.5}$  is associated with disproportionately higher health risks per unit exposure compared with other  $PM_{2.5}$  sources, including greater impacts on respiratory and cardiovascular outcomes [34–36].

Previous studies have also reported the deleterious effects of  $PM_{2.5}$ ’s on various respiratory diseases, including COPD [37,38], asthma [39,40], lung cancer [41], idiopathic pulmonary fibrosis [42,43], acute respiratory infections [44,45], bronchiectasis [46], and tuberculosis [47,48]. However, most of this research has focused on chronic non-communicable conditions. Our study expands this evidence base by highlighting the impact of  $PM_{2.5}$ —particularly from wildfires—on respiratory infections. Notably, recent studies have shown that wildfire-related  $PM_{2.5}$  exacerbates COVID-19 incidence and mortality [16,49]. Given that both COVID-19 and influenza are icosahedral respiratory viruses sharing similar transmission routes and immune vulnerabilities, air pollution may amplify risks through shared mechanisms. Evidence from wildfire-prone regions such as California and Brazil supports this association [50–53]. Our findings align with this literature and suggest that even short-term wildfire  $PM_{2.5}$  exposure can impair host defenses and promote viral spread, underscoring the need for coordinated air quality and epidemic control strategies during wildfire seasons.

We also assessed the nonlinear exposure–response between the wildfire-related  $PM_{2.5}$  and incidence of respiratory transmitted diseases, which suggests that there is no safe threshold of the wildfire-related  $PM_{2.5}$  exposure. Although the national analysis indicates a non-linear association between the concentration of wildfire-related  $PM_{2.5}$  and the incidence of respiratory transmitted diseases, it is noteworthy that majority of the sample are concentrated within the 0–5  $\mu\text{g}/\text{m}^3$  range of wildfire-related  $PM_{2.5}$  concentration. Within this concentration range, the association between wildfire-related  $PM_{2.5}$  and the incidence of respiratory transmitted diseases tends to be linear. Additionally, as the concentration of wildfire-related  $PM_{2.5}$  increases, the confidence interval correspondingly expands. Compared to previous studies on the non-linear association of the total  $PM_{2.5}$ , our study finds that the effects are more pronounced at lower concentrations, with the slope becoming gentler at higher concentrations, similar to previous findings [54–58]. The difference lies in the fact that a large portion of the population is actually exposed to lower concentrations of wildfire-related  $PM_{2.5}$ .

Wildfire-related  $PM_{2.5}$  may promote the onset of respiratory infections through several biological mechanisms. Wildfire smoke, represented by wildfire-related  $PM_{2.5}$ , has a more complex composition than non-wildfire  $PM_{2.5}$ , including microbes [8]. Due to the lack of assessment of wildfire-related microbes, a direct evaluation of the association between microbes and infectious diseases cannot be conducted. This suggests that the influence of wildfire smoke on infectious diseases is more complex than  $PM_{2.5}$  alone, involving the interaction between microbes in wildfire smoke and wildfire  $PM_{2.5}$ . One supporting piece of evidence is the increased risk of fungal infections following exposure to wildfire smoke [59]. In the areas with lower level of wildfire-related  $PM_{2.5}$  concentrations, up to 42.6% of respiratory transmitted disease cases associated with  $PM_{2.5}$  can be specifically attributed to wildfire exposure. This may be due to the smaller particle size of particulates



from wildfires compared to those from urban sources. After long-distance transport, these smaller particles may possess greater oxidative capacity [60,61]. Furthermore, despite lower concentrations after long-distance transport and particulate settling, the remaining particles could potentially pose a greater health hazard. Such properties may contribute to greater biological activity and increased incidence of infectious diseases, even at lower ambient concentrations. Currently, research on the mechanisms by which  $PM_{2.5}$  impacts the incidence of infectious diseases is limited. Nevertheless, we hypothesize several potential pathways. First,  $PM_{2.5}$  may increase the risk of infection by impairing the respiratory tract and lung barrier function, thereby facilitating pathogen invasion and increasing the likelihood of disease onset [62,63]. Second,  $PM_{2.5}$  could exacerbate infection-related symptoms by inducing oxidative stress and inflammatory responses, disrupting the immune system's equilibrium, and thereby increasing the risk and severity of infectious diseases [62–64]. It is important to note that current research on these mechanisms is relatively limited, necessitating further comprehensive investigations to fully understand the impact of  $PM_{2.5}$  on infectious diseases.

Multiple studies indicate that climate change is poised to escalate both frequency and intensity of wildfires in the future [1,3,65,66]. Prior investigations have revealed that billions of people globally are exposed to substantial wildfire air pollution, especially in hotspot and underdeveloped regions [22]. However, our research extends these findings, showing that even populations in areas not directly afflicted by intense wildfire pollution experience substantial effects, underscoring the far-reaching, global ramifications of climate change. This highlights the necessity for extensive international cooperation to curtail global temperature increases and mitigate wildfire incidents effectively [65]. Earlier research supports this approach, indicating that maintaining the global average temperature increase within 2.0 or 1.5 °C above pre-industrial levels could avert 60% or 80% of the projected escalation in wildfire exposure, respectively [6,65].

### Strengths and limitations

The study leveraged a comprehensive national dataset, notable for its substantial sample size and extensive coverage across geographic regions. This dataset, comprising data from 6 million cases involving children and adolescents, provided a unique opportunity for a systematic and consistent evaluation of associations. Our study encompassed a wide range of wildfire-related pollution levels, allowing us to provide more representative estimates of the effects of short-term wildfire-related  $PM_{2.5}$  exposure on respiratory transmitted diseases. Several limitations of this study should be noted.

There is a potential for exposure measurement error due to the use of city average values as proxies for individual exposure levels. The average exposure calculations for larger geographic areas may not precisely reflect the individual exposure levels to wildfire-related air pollution, which can vary significantly within a city. Additionally, the  $0.25^\circ \times 0.25^\circ$  (~28 km) grid resolution of the exposure dataset may not capture fine-scale spatial heterogeneity, particularly in small or topographically complex cities. Additionally, the inability to access the specific address data of children and adolescents for privacy reasons might have introduced non-differential error, typically leading to an attenuation of effect estimates [67]. The average exposure calculations for larger geographic areas may not precisely reflect the individual exposure levels to wildfire-related air pollution, which can vary significantly within a city. Despite the CISDCP encompassing over 95% of health facilities, there remains a possibility of omission or underreporting of some infectious and mortality cases. Such underreporting could introduce errors in the outcome measurement, potentially biasing the associations between wildfire-related  $PM_{2.5}$  and respiratory transmitted diseases towards null, under the assumption that these inaccuracies are not related to wildfire-related  $PM_{2.5}$  exposure. The data was sourced from China, implying that its conclusions might not be entirely applicable to other countries or regions with different wildfire patterns and air pollution components. However, to our knowledge, this study is the first to encompass all regions of China and include over 330 million children and adolescents aged 4–24 years, providing large-scale evidence for the association between wildfire-related  $PM_{2.5}$  and respiratory transmitted diseases. Although geographical and environmental differences may limit the generalizability of the study results, the large scale and comprehensiveness of this research make it a significant reference for understanding the impact of wildfire  $PM_{2.5}$  on human health. This study focused on individuals aged 4–24 years, aligning with the formal



education age range in China. However, several respiratory transmitted diseases—notably measles, pertussis, meningococcal meningitis, and diphtheria—commonly affect children under 5 years of age. Excluding children younger than three may result in an underestimation of the real disease burden and limit the generalisability of our findings to early childhood. Further research is needed to evaluate the health impacts of wildfire-related  $PM_{2.5}$  exposure in younger children. Additionally, the exposure window used in this study (lag 0–28 days) is more appropriate for acute infections with short incubation periods. Interpretations of associations for chronic infectious diseases, such as tuberculosis or leprosy, should therefore be made with caution. Finally, the limited number of mortality events in our dataset substantially constrained statistical power for detecting associations with mortality outcomes; as such, these results should be interpreted with caution and warrant further investigation in larger datasets. Although a linear exposure–response function was applied, the  $+5 \mu\text{g}/\text{m}^3$  increment may reflect an extreme value in some regions, potentially introducing instability in lag-specific estimates, particularly in early lags and low-exposure settings.

Employing an extensive national dataset and established statistical methodologies, our study identified a robust association between short-term exposure to wildfire-related  $PM_{2.5}$  and an increased incidence of respiratory transmitted diseases, with greater impact compared with non-wildfire-related  $PM_{2.5}$ . The high proportion of respiratory transmitted disease cases associated with wildfire-related  $PM_{2.5}$ , out of all cases associated with total  $PM_{2.5}$  in areas with lower concentrations of wildfire-related  $PM_{2.5}$ , confirms the extensive impact of wildfires on human health. Compared to the direct effects in high-concentration areas, populations in low-concentration areas also face a higher risk of respiratory transmitted diseases.

## Supporting information

**S1 Text. Summary of diagnostic criteria for 10 notifiable infectious diseases .**  
(DOCX)

**S1 Table. The descriptive of specific-cause respiratorily transmitted infectious diseases counts in China.**  
(XLSX)

**S2 Table. Descriptive of daily wildfire-related PM25 and O3 concentration.**  
(XLSX)

**S3 Table. Results of sensitive analysis.**  
(XLSX)

**S1 Fig. The locations of the 501 Chinese prefecture-level cities included in the present study.** Notes: Spatial boundaries were retrieved from Natural Earth (<https://www.naturalearthdata.com/>) using the “naturalearth” package (<https://github.com/ropenscilabs/rnaturalearth>).  
(TIF)

**S2 Fig. Distribution of death cases.** Notes: Spatial boundaries were retrieved from Natural Earth (<https://www.naturalearthdata.com/>) using the “naturalearth” package (<https://github.com/ropenscilabs/rnaturalearth>).  
(TIF)

**S3 Fig. Annual spatial distribution of incidence cases and concentrations of wildfire-related with temporal trends.**  
(TIF)

**S4 Fig. Association between wildfire-related  $PM_{2.5}$  exposure (per  $5 \mu\text{g}/\text{m}^3$  increase) and incidence and mortality of respiratory transmitted diseases across lag 0–28 days, using a linear exposure-response function.**  
(TIF)



**S5 Fig. Estimated associations between respiratory infectious cases and wildfire-related or non-wildfire-related PM<sub>2.5</sub> exposure by subpopulation.** Note: Low refers to areas with yearly wildfire-related PM<sub>2.5</sub> concentrations <1.5 µg/m<sup>3</sup>; High denotes areas with yearly wildfire-related PM<sub>2.5</sub> concentrations ≥1.5 µg/m<sup>3</sup>. Subfigure A presents the estimated association between respiratory transmitted disease and wildfire-related PM<sub>2.5</sub> by subgroups, while Subfigure B presents the estimated association between respiratory transmitted diseases and non-wildfire-related PM<sub>2.5</sub> by subgroups. (TIF)

**S6 Fig. Results of subgroup analysis**  
(TIF)

**S7 Fig. Proportion that contributed to Wildfire-related PM<sub>2.5</sub> of PM<sub>2.5</sub>-linked respiratory transmitted diseases based on the national estimated association.** Notes; Spatial boundaries were retrieved from Natural Earth (<https://www.naturalearthdata.com/>) using the “naturalearth” package (<https://github.com/ropenscilabs/rnaturalearth>). (TIF)

**S4 Table. Respiratory infectious disease cases attributable to wildfire-related PM<sub>2.5</sub> by province, China.**  
(XLSX)

## Acknowledgments

The authors would like to acknowledge the support from all the team members and all the health staff involved in the China National Notifiable Infectious Disease Surveillance System. The authors gratefully acknowledge Dr. Liping Wang for her contributions to the early phases of the study design and data preparation.

## Author contributions

**Conceptualization:** Li Chen, Rongbin Xu, Yanhui Dong, Shanshan Li.

**Data curation:** Li Chen, Rongbin Xu.

**Formal analysis:** Li Chen.

**Software:** Li Chen.

**Supervision:** Rongbin Xu, Yanhui Dong, Yi Song, Jun Ma, Shanshan Li, Yuming Guo.

**Visualization:** Li Chen.

**Writing – original draft:** Li Chen.

**Writing – review & editing:** Li Chen, Rongbin Xu, Junqing Xie, Yi Xing, Bo Wen, Yao Wu, Binbin Su, Mengjie Geng, Xiang Ren, Yi Zhang, Jieyu Liu, Xinli Song, Yang Qin, RuoLin Wang, Jianuo Jiang, Tongjun Guo, Wen Yuan, Yinghua Ma, Yanhui Dong, Yi Song, Shanshan Li, Yuming Guo.

## References

1. Bowman DMJS, Kolden CA, Abatzoglou JT, Johnston FH, Werf GRVD, Flannigan MJNRE. Vegetation fires in the Anthropocene.
2. Xie Y, Lin M, Decharme B, Delire C, Horowitz LW, Lawrence DM, et al. Tripling of western US particulate pollution from wildfires in a warming climate. *Proc Natl Acad Sci U S A*. 2022;119(14):e2111372119. <https://doi.org/10.1073/pnas.2111372119> PMID: 35344431
3. Morawska L, Zhu T, Liu N, Amouei Torkmahalleh M, de Fatima Andrade M, Barratt B, et al. The state of science on severe air pollution episodes: quantitative and qualitative analysis. *Environ Int*. 2021;156:106732. <https://doi.org/10.1016/j.envint.2021.106732> PMID: 34197974
4. Abatzoglou JT, Williams AP. Impact of anthropogenic climate change on wildfire across western US forests. *Proc Natl Acad Sci U S A*. 2016;113(42):11770–5. <https://doi.org/10.1073/pnas.1607171113> PMID: 27791053
5. Jolly WM, Cochrane MA, Freeborn PH, Holden ZA, Brown TJ, Williamson GJ, et al. Climate-induced variations in global wildfire danger from 1979 to 2013. *Nat Commun*. 2015;6:7537. <https://doi.org/10.1038/ncomms8537> PMID: 26172867



6. Xu R, Yu P, Abramson MJ, Johnston FH, Samet JM, Bell ML, et al. Wildfires, global climate change, and human health. *N Engl J Med*. 2020;383(22):2173–81. <https://doi.org/10.1056/NEJMSr2028985> PMID: [33034960](#)
7. Black C, Tesfaigzi Y, Bassein JA, Miller LA. Wildfire smoke exposure and human health: significant gaps in research for a growing public health issue. *Environ Toxicol Pharmacol*. 2017;55:186–95. <https://doi.org/10.1016/j.etap.2017.08.022> PMID: [28892756](#)
8. Kobziar LN, Thompson GR 3rd. Wildfire smoke, a potential infectious agent. *Science*. 2020;370(6523):1408–10. <https://doi.org/10.1126/science.abe8116> PMID: [33335049](#)
9. Feng S, Gao D, Liao F, Zhou F, Wang X. The health effects of ambient PM2.5 and potential mechanisms. *Ecotoxicol Environ Saf*. 2016;128:67–74. <https://doi.org/10.1016/j.ecoenv.2016.01.030> PMID: [26896893](#)
10. Lu F, Xu D, Cheng Y, Dong S, Guo C, Jiang X, et al. Systematic review and meta-analysis of the adverse health effects of ambient PM2.5 and PM10 pollution in the Chinese population. *Environ Res*. 2015;136:196–204. <https://doi.org/10.1016/j.envres.2014.06.029> PMID: [25460637](#)
11. Dong TTT, Hinwood AL, Callan AC, Zosky G, Stock WD. In vitro assessment of the toxicity of bushfire emissions: a review. *Sci Total Environ*. 2017;603–604:268–78. <https://doi.org/10.1016/j.scitotenv.2017.06.062> PMID: [28628818](#)
12. Chen G, Guo Y, Yue X, Tong S, Gasparrini A, Bell ML, et al. Mortality risk attributable to wildfire-related PM2.5 pollution: a global time series study in 749 locations. *Lancet Planet Health*. 2021;5(9):e579–87. [https://doi.org/10.1016/S2542-5196\(21\)00200-X](https://doi.org/10.1016/S2542-5196(21)00200-X) PMID: [34508679](#)
13. Gould CF, Heft-Neal S, Johnson M, Aguilera J, Burke M, Nadeau K. Health effects of wildfire smoke exposure. *Annu Rev Med*. 2024;75:277–92. <https://doi.org/10.1146/annurev-med-052422-020909> PMID: [37738508](#)
14. Zhang Y, Tingting Y, Huang W, Yu P, Chen G, Xu R, et al. Health impacts of wildfire smoke on children and adolescents: a systematic review and meta-analysis. *Curr Environ Health Rep*. 2024;11(1):46–60. <https://doi.org/10.1007/s40572-023-00420-9> PMID: [38038861](#)
15. Landguth EL, Holden ZA, Graham J, Stark B, Mokhtari EB, Kaleczyc E, et al. The delayed effect of wildfire season particulate matter on subsequent influenza season in a mountain west region of the USA. *Environ Int*. 2020;139:105668. <https://doi.org/10.1016/j.envint.2020.105668> PMID: [32244099](#)
16. Zhou X, Josey K, Kamareddine L, Caine MC, Liu T, Mickley LJ, et al. Excess of COVID-19 cases and deaths due to fine particulate matter exposure during the 2020 wildfires in the United States. *Sci Adv*. 2021;7(33):eabi8789. <https://doi.org/10.1126/sciadv.abi8789> PMID: [34389545](#)
17. Woodby B, Arnold MM, Valacchi G. SARS-CoV-2 infection, COVID-19 pathogenesis, and exposure to air pollution: what is the connection? *Ann N Y Acad Sci*. 2021;1486(1):15–38. <https://doi.org/10.1111/nyas.14512> PMID: [33022781](#)
18. Navarro KM, Clark KA, Hardt DJ, Reid CE, Lahm PW, Domitrovich JW, et al. Wildland firefighter exposure to smoke and COVID-19: a new risk on the fire line. *Sci Total Environ*. 2021;760:144296. <https://doi.org/10.1016/j.scitotenv.2020.144296> PMID: [33341613](#)
19. Dong Y, Wang L, Burgner DP, Miller JE, Song Y, Ren X, et al. Infectious diseases in children and adolescents in China: analysis of national surveillance data from 2008 to 2017. *BMJ*. 2020;369:m1043. <https://doi.org/10.1136/bmj.m1043> PMID: [32241761](#)
20. Wang L, Wang Y, Jin S, Wu Z, Chin DP, Koplan JP, et al. Emergence and control of infectious diseases in China. *Lancet*. 2008;372(9649):1598–605. [https://doi.org/10.1016/S0140-6736\(08\)61365-3](https://doi.org/10.1016/S0140-6736(08)61365-3) PMID: [18930534](#)
21. Nations U. Definition of youth [cited 2023 Oct 1]. Available from: <https://www.un.org/esa/socdev/documents/youth/fact-sheets/youth-definition.pdf>
22. Xu R, Ye T, Yue X, Yang Z, Yu W, Zhang Y, et al. Global population exposure to landscape fire air pollution from 2000 to 2019. *Nature*. 2023;621(7979):521–9. <https://doi.org/10.1038/s41586-023-06398-6> PMID: [37730866](#)
23. ECMWF. ERA5 hourly data on single levels from 1979 to present. [cited 2021 Sep 28]. Available from: <https://cds.climate.copernicus.eu/cdsapp#!/dataset/reanalysis-era5-single-levels?tab=overview>
24. Cai J. Humidity: calculate water vapor measures from temperature and dew point. R package version 0.1.4. CRAN; 2018 [updated 2018-12-01]; 2018 6 10. Available from: <https://CRAN.R-project.org/package=humidity>
25. Lloyd CT, Chamberlain H, Kerr D, Yetman G, Pistolesi L, Stevens FR, et al. Global spatio-temporally harmonised datasets for producing high-resolution gridded population distribution datasets. *Big Earth Data*. 2019;3(2):108–39. <https://doi.org/10.1080/20964471.2019.1625151> PMID: [31565697](#)
26. Wang X, Wang S, Kindzierski W. Eliminating systematic bias from case-crossover designs. *Stat Methods Med Res*. 2019;28(10–11):3100–11. <https://doi.org/10.1177/0962280218797145> PMID: [30189796](#)
27. Levy D, Sheppard L, Checkoway H, Kaufman J, Lumley T, Koenig J, et al. A case-crossover analysis of particulate matter air pollution and out-of-hospital primary cardiac arrest. *Epidemiology*. 2001;12(2):193–9. <https://doi.org/10.1097/00001648-200103000-00011> PMID: [11246580](#)
28. Janes H, Sheppard L, Lumley T. Case-crossover analyses of air pollution exposure data: referent selection strategies and their implications for bias. *Epidemiology*. 2005;16(6):717–26. <https://doi.org/10.1097/01.ede.0000181315.18836.9d> PMID: [16222160](#)
29. Hogue CJ, Gaylor DW, Schulz KF. Estimators of relative risk for case-control studies. *Am J Epidemiol*. 1983;118(3):396–407. <https://doi.org/10.1093/oxfordjournals.aje.a113646> PMID: [6613982](#)
30. Greenland S, Thomas DC. On the need for the rare disease assumption in case-control studies. *Am J Epidemiol*. 1982;116(3):547–53. <https://doi.org/10.1093/oxfordjournals.aje.a113439> PMID: [7124721](#)
31. Gao Y, Huang W, Xu Z, Xu R, Gasevic D, Liu Y. Wildfire-related PM2.5 and cause-specific cancer mortality. *Ecotoxicol Environ Saf*. 2024;285:6.
32. Zhang Y, Xu R, Huang W. Respiratory risks from wildfire-specific PM2.5 across multiple countries and territories. *Nat Sustain*. 2025;8:474–84.



33. Yu Y, Zou W, Jerrett M, Meng YY. Acute health impact of wildfire-related and conventional PM2.5 in the United States: a narrative review. 2023;12.
34. Aguilera R, Corringham T, Gershunov A, Benmarhnia T. Wildfire smoke impacts respiratory health more than fine particles from other sources: observational evidence from Southern California. In: ISEE Conference Abstracts, 2020.
35. Reid CE, Brauer M, Johnston FH, Jerrett M, Balmes JR, Elliott CT. Critical review of health impacts of wildfire smoke exposure. *Environ Health Perspect*. 2016;124(9):1334–43. <https://doi.org/10.1289/ehp.1409277> PMID: 27082891
36. Vega SL, Childs ML, Aggarwal S, Nethery RC. Wildfire smoke exposure and cause-specific hospitalization in older adults. *JAMA Netw Open*. 2025;8(4):e257956. <https://doi.org/10.1001/jamanetworkopen.2025.7956> PMID: 40305019
37. Singh D, Agusti A, Anzueto A, Barnes PJ, Bourbeau J, Celli BR, et al. Global strategy for the diagnosis, management, and prevention of chronic obstructive lung disease: the GOLD science committee report 2019. *Eur Respir J*. 2019;53(5):1900164. <https://doi.org/10.1183/13993003.00164-2019> PMID: 30846476
38. Liang L, Cai Y, Barratt B, Lyu B, Chan Q, Hansell AL, et al. Associations between daily air quality and hospitalisations for acute exacerbation of chronic obstructive pulmonary disease in Beijing, 2013–17: an ecological analysis. *Lancet Planet Health*. 2019;3(6):e270–9. [https://doi.org/10.1016/S2542-5196\(19\)30085-3](https://doi.org/10.1016/S2542-5196(19)30085-3) PMID: 31229002
39. Cadelis G, Tourres R, Molinier J. Short-term effects of the particulate pollutants contained in Saharan dust on the visits of children to the emergency department due to asthmatic conditions in Guadeloupe (French Archipelago of the Caribbean). *PLoS One*. 2014;9(3):e91136. <https://doi.org/10.1371/journal.pone.0091136> PMID: 24603899
40. Johannson KA, Vittinghoff E, Lee K, Balmes JR, Ji W, Kaplan GG, et al. Acute exacerbation of idiopathic pulmonary fibrosis associated with air pollution exposure. *Eur Respir J*. 2014;43(4):1124–31. <https://doi.org/10.1183/09031936.00122213> PMID: 24176998
41. Raaschou-Nielsen O, Andersen ZJ, Beelen R, Samoli E, Stafoggia M, Weinmayr G, et al. Air pollution and lung cancer incidence in 17 European cohorts: prospective analyses from the European Study of Cohorts for Air Pollution Effects (ESCAPE). *Lancet Oncol*. 2013;14(9):813–22. [https://doi.org/10.1016/S1470-2045\(13\)70279-1](https://doi.org/10.1016/S1470-2045(13)70279-1) PMID: 23849838
42. Johannson KA, Balmes JR, Collard HR. Air pollution exposure: a novel environmental risk factor for interstitial lung disease?. *Chest*. 2015;147(4):1161–7. <https://doi.org/10.1378/chest.14-1299> PMID: 25846532
43. Johannson KA, Vittinghoff E, Morisset J, Wolters PJ, Noth EM, Balmes JR, et al. Air pollution exposure is associated with lower lung function, but not changes in lung function, in patients with idiopathic pulmonary fibrosis. *Chest*. 2018;154(1):119–25. <https://doi.org/10.1016/j.chest.2018.01.015> PMID: 29355549
44. Zheng P-W, Wang J-B, Zhang Z-Y, Shen P, Chai P-F, Li D, et al. Air pollution and hospital visits for acute upper and lower respiratory infections among children in Ningbo, China: a time-series analysis. *Environ Sci Pollut Res Int*. 2017;24(23):18860–9. <https://doi.org/10.1007/s11356-017-9279-8> PMID: 28653196
45. Nsoh M, Mankollo BOY, Ebongue M, Cyprien KN, Likeng JLN, Islam SMS, et al. Acute respiratory infection related to air pollution in Bamenda, North West Region of Cameroon. *Pan Afr Med J*. 2019;32:99. <https://doi.org/10.11604/pamj.2019.32.99.15228> PMID: 31223389
46. Garcia-Olivé I, Stojanovic Z, Radua J, Rodriguez-Pons L, Martinez-Rivera C, Ruiz Manzano J. Effect of air pollution on exacerbations of bronchiectasis in Badalona, Spain, 2008–2016. *Respiration*. 2018;96(2):111–6. <https://doi.org/10.1159/000488646> PMID: 29772571
47. Popovic I, Soares Magalhaes RJ, Ge E, Marks GB, Dong G-H, Wei X, et al. A systematic literature review and critical appraisal of epidemiological studies on outdoor air pollution and tuberculosis outcomes. *Environ Res*. 2019;170:33–45. <https://doi.org/10.1016/j.envres.2018.12.011> PMID: 30557690
48. Jassal MS, Bakman I, Jones B. Correlation of ambient pollution levels and heavily-trafficked roadway proximity on the prevalence of smear-positive tuberculosis. *Public Health*. 2013;127(3):268–74. <https://doi.org/10.1016/j.puhe.2012.12.030> PMID: 23453197
49. Meo SA, Abukhalaf AA, Alomar AA, Alessa OM. Wildfire and COVID-19 pandemic: effect of environmental pollution PM-2.5 and carbon monoxide on the dynamics of daily cases and deaths due to SARS-COV-2 infection in San-Francisco USA. *Eur Rev Med Pharmacol Sci*. 2020;24(19):10286–92. [https://doi.org/10.26355/eurrev\\_202010\\_23253](https://doi.org/10.26355/eurrev_202010_23253) PMID: 33090440
50. Yu S, Hsueh L. Do wildfires exacerbate COVID-19 infections and deaths in vulnerable communities? Evidence from California. *J Environ Manage*. 2023;328:116918. <https://doi.org/10.1016/j.jenvman.2022.116918> PMID: 36529003
51. Meo SA, Abukhalaf AA, Alomar AA, Alessa OM, Sami W, Klonoff DC. Effect of environmental pollutants PM-2.5, carbon monoxide, and ozone on the incidence and mortality of SARS-COV-2 infection in ten wildfire affected counties in California. *Sci Total Environ*. 2021;757:143948. <https://doi.org/10.1016/j.scitotenv.2020.143948> PMID: 33321340
52. Lorenz C, Libonati R, Belém LBC, Oliveira A, Chiaravallotti RM, Nunes AV, et al. Wildfire and smoke association with COVID-19 cases in the Pantanal wetland, Brazil. *Public Health*. 2023;225:311–9. <https://doi.org/10.1016/j.puhe.2023.10.032> PMID: 37972494
53. Ademu LO, Gao J, Thompson OP, Ademu LA. Impact of short-term air pollution on respiratory infections: a time-series analysis of COVID-19 cases in California during the 2020 wildfire season. *Int J Environ Res Public Health*. 2022;19(9):5057. <https://doi.org/10.3390/ijerph19095057> PMID: 35564452
54. Strak M, Weinmayr G, Rodopoulou S, Chen J, de Hoogh K, Andersen ZJ, et al. Long term exposure to low level air pollution and mortality in eight European cohorts within the ELAPSE project: pooled analysis. *BMJ*. 2021;374:n1904. <https://doi.org/10.1136/bmj.n1904> PMID: 34470785
55. Liu C, Chen R, Sera F, Vicedo-Cabrera AM, Guo Y, Tong S, et al. Ambient particulate air pollution and daily mortality in 652 cities. *N Engl J Med*. 2019;381(8):705–15. <https://doi.org/10.1056/NEJMoa1817364> PMID: 31433918



56. Samoli E, Analitis A, Touloumi G, Schwartz J, Anderson HR, Sunyer J, et al. Estimating the exposure-response relationships between particulate matter and mortality within the APHEA multicity project. *Environ Health Perspect*. 2005;113(1):88–95. <https://doi.org/10.1289/ehp.7387> PMID: [15626653](https://pubmed.ncbi.nlm.nih.gov/15626653/)
57. Di Q, Dai L, Wang Y, Zanobetti A, Choirat C, Schwartz JD, et al. Association of short-term exposure to air pollution with mortality in older adults. *JAMA*. 2017;318(24):2446–56. <https://doi.org/10.1001/jama.2017.17923> PMID: [29279932](https://pubmed.ncbi.nlm.nih.gov/29279932/)
58. Chen R, Yin P, Meng X, Liu C, Wang L, Xu X, et al. Fine particulate air pollution and daily mortality: a nationwide analysis in 272 Chinese cities. *Am J Respir Crit Care Med*. 2017;196(1):73–81. <https://doi.org/10.1164/rccm.201609-1862OC> PMID: [28248546](https://pubmed.ncbi.nlm.nih.gov/28248546/)
59. Mulliken JS, Hampshire KN, Rappold AG, Fung M, Babik JM, Doernberg SB. Risk of systemic fungal infections after exposure to wildfires: a population-based, retrospective study in California. *Lancet Planet Health*. 2023;7(5):e381–6. [https://doi.org/10.1016/S2542-5196\(23\)00046-3](https://doi.org/10.1016/S2542-5196(23)00046-3) PMID: [37164514](https://pubmed.ncbi.nlm.nih.gov/37164514/)
60. Verma V, Polidori A, Schauer JJ, Shafer MM, Cassee FR, Sioutas C. Physicochemical and toxicological profiles of particulate matter in Los Angeles during the October 2007 southern California wildfires. *Environ Sci Technol*. 2009;43(3):954–60. <https://doi.org/10.1021/es8021667> PMID: [19245042](https://pubmed.ncbi.nlm.nih.gov/19245042/)
61. Makkonen U, Hellén H, Anttila P, Ferm M. Size distribution and chemical composition of airborne particles in south-eastern Finland during different seasons and wildfire episodes in 2006. *Sci Total Environ*. 2010;408(3):644–51. <https://doi.org/10.1016/j.scitotenv.2009.10.050> PMID: [19903567](https://pubmed.ncbi.nlm.nih.gov/19903567/)
62. Loaiza-Ceballos MC, Marin-Palma D, Zapata W, Hernandez JC. Viral respiratory infections and air pollutants. *Air Qual Atmos Health*. 2022;15(1):105–14. <https://doi.org/10.1007/s11869-021-01088-6> PMID: [34539932](https://pubmed.ncbi.nlm.nih.gov/34539932/)
63. Bourdrel T, Annesi-Maesano I, Alahmad B, Maesano CN, Bind M-A. The impact of outdoor air pollution on COVID-19: a review of evidence from in vitro, animal, and human studies. *Eur Respir Rev*. 2021;30(159):200242. <https://doi.org/10.1183/16000617.0242-2020> PMID: [33568525](https://pubmed.ncbi.nlm.nih.gov/33568525/)
64. Yang L, Li C, Tang X. The Impact of PM2.5 on the Host Defense of Respiratory System. *Front Cell Dev Biol*. 2020;8:91. <https://doi.org/10.3389/fcell.2020.00091> PMID: [32195248](https://pubmed.ncbi.nlm.nih.gov/32195248/)
65. Sun Q, Miao C, Hanel M, Borthwick AGL, Duan Q, Ji D, et al. Global heat stress on health, wildfires, and agricultural crops under different levels of climate warming. *Environ Int*. 2019;128:125–36. <https://doi.org/10.1016/j.envint.2019.04.025> PMID: [31048130](https://pubmed.ncbi.nlm.nih.gov/31048130/)
66. Hurteau MD, Liang S, Westerling AL, Wiedinmyer C. Vegetation-fire feedback reduces projected area burned under climate change. *Sci Rep*. 2019;9(1):2838. <https://doi.org/10.1038/s41598-019-39284-1> PMID: [30808990](https://pubmed.ncbi.nlm.nih.gov/30808990/)
67. Goldman GT, Mulholland JA, Russell AG, Strickland MJ, Klein M, Waller LA, et al. Impact of exposure measurement error in air pollution epidemiology: effect of error type in time-series studies. *Environ Health*. 2011;10:61. <https://doi.org/10.1186/1476-069X-10-61> PMID: [21696612](https://pubmed.ncbi.nlm.nih.gov/21696612/)
